# Supplementary material for: Transcriptome Remodeling Contributes to Epidemic Disease Caused by the Human Pathogen Streptococcus pyogenes
Source: PubMed Central journal article supplement (PMC4895104; doi:10.1128/mbio.00403-16), 2016-05-31
Supplement: mbo003162837sf2.pdf [file mbo003162837sf2.pdf]

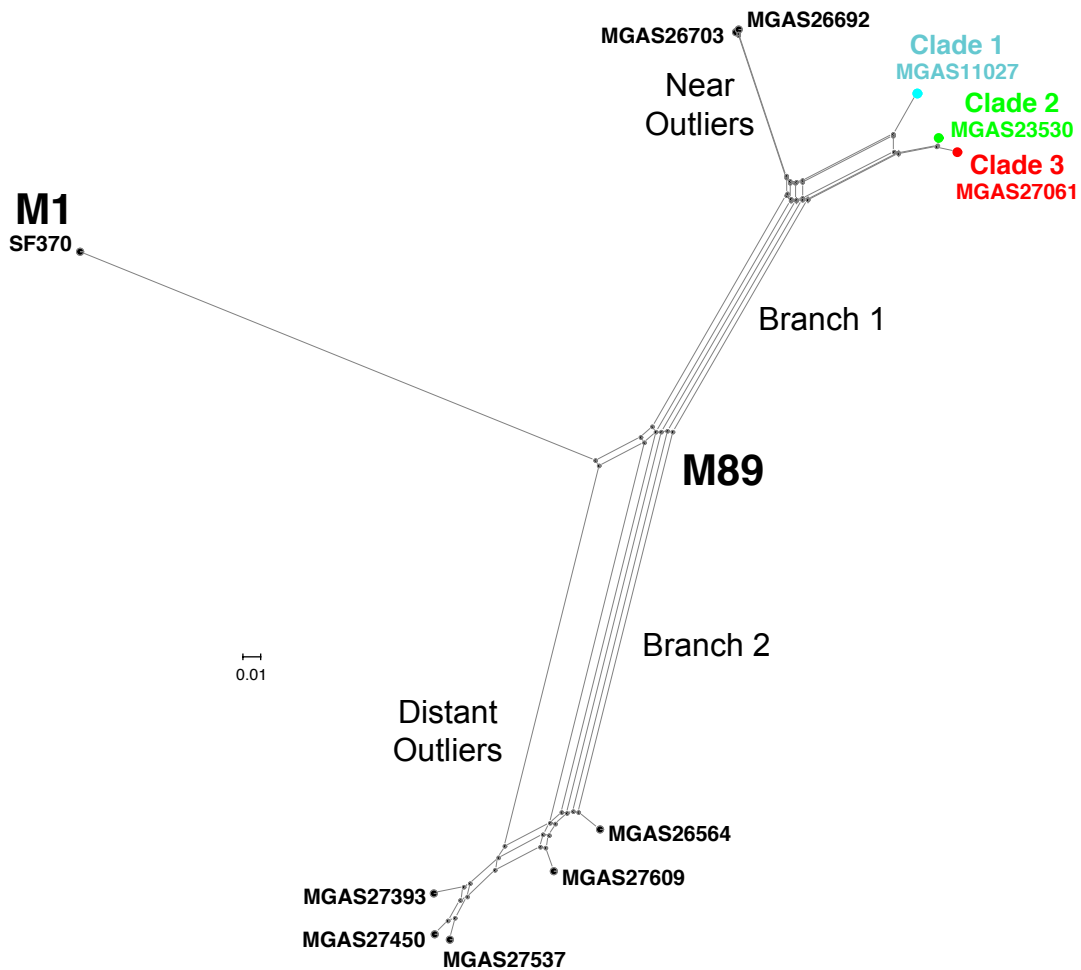

Fig. S2. Genetic relationships among *emm89* reference strain, with *emm1* reference strain SF370 used as the rooting outgroup. Shown are genetic relationships among the three *emm89* reference strains and the seven outlier strains using *emm1* reference strain SF370 as an outgroup. Relationships were inferred based on 26,371 core SNPs by neighbor-network splits-decomposition. The sequence of branching of the three numerically dominant *emm89* primary clades along the evolutionary path leading to the contemporary epidemic *emm89* strains is clade1 (MGAS11027), followed by clade 2 (MGAS23530) and then epidemic clade 3 (MGAS27061).
